# Supplementary material for: Room temperature asymmetric Pd-catalyzed methoxycarbonylation of norbornene: highly selective catalysis and HP-NMR studies
Source: Royal Society of Chemistry journal article supplement (doi:10.1039/c2dt30267e), 2012-01-01
Supplement: c2dt30267e.pdf [file c2dt30267e.pdf]

## Supporting Information

### Room Temperature Asymmetric Pd-Catalyzed Methoxycarbonylation of Norbornene. Highly Selective Catalysis and HP-NMR Studies

Carolina Blanco<sup>[a]</sup>, Cyril Godard,<sup>\*[a]</sup> Ennio Zangrando,<sup>[b]</sup> Aurora Ruiz<sup>[a]</sup> and Carmen Claver<sup>\*[a]</sup>

*[a]* Departament de Química Física i Inorgànica,  
Universitat Rovira i Virgili, Marcel·li Domingo s/n,  
43007, Tarragona, Spain.

*[b]* Dipartimento di Scienze Chimiche e Farmaceutiche,  
Università di Trieste, via Licio Giorgieri 1,  
34127 Trieste, Italy.

## Contents

|                                                                                                         |   |
|---------------------------------------------------------------------------------------------------------|---|
| SI. 1 Experimental Section.....                                                                         | 3 |
| SI. 2 Characterization of Palladium Complexes.....                                                      | 3 |
| Figure 1. $^1\text{H}$ NMR spectrum of $[\text{PdCl}_2(\mathbf{1})_2]$ <b>1a</b> .....                  | 3 |
| Figure 2. $^{31}\text{P}\{^1\text{H}\}$ NMR spectrum of $[\text{PdCl}_2(\mathbf{1})_2]$ <b>1a</b> ..... | 3 |
| Figure 3. $^1\text{H}$ NMR spectrum of $[\text{PdCl}_2(\mathbf{4})]$ <b>4a</b> .....                    | 4 |
| Figure 4. $^{31}\text{P}\{^1\text{H}\}$ NMR spectrum of $[\text{PdCl}_2(\mathbf{4})]$ <b>4a</b> .....   | 4 |
| Figure 5. $^1\text{H}$ NMR spectrum of <b>4-(H<sup>+</sup>)<sub>2</sub></b> .....                       | 5 |
| Figure 6. $^{31}\text{P}\{^1\text{H}\}$ NMR spectrum of <b>4-(H<sup>+</sup>)<sub>2</sub></b> .....      | 5 |
| Figure 7. $^1\text{H}$ NMR spectrum of $[\text{PdBr}(\mathbf{7})]$ <b>7a</b> .....                      | 6 |
| Figure 8. $^{31}\text{P}\{^1\text{H}\}$ NMR spectrum of $[\text{PdBr}(\mathbf{7})]$ <b>7a</b> .....     | 6 |
| SI. 3 X-ray data .....                                                                                  | 7 |
| Table 1. Crystal data for structures <b>4a</b> and <b>7a</b> .....                                      | 7 |

## SI. 1 Experimental Section

### General Methods

All reactions were carried out under an argon atmosphere using Standard Schlenk techniques. All solvents were carefully purified by appropriate procedures. PdCl<sub>2</sub> was purchased from Johnson Matthey Inc. and used without further purification. All other reagents were used as received from commercial suppliers. CD<sub>2</sub>Cl<sub>2</sub>, THF-d<sub>8</sub>, CDCl<sub>3</sub> were stored over molecular sieves under nitrogen. Air sensitive compounds were stored under argon.

### NMR data

<sup>1</sup>H, <sup>13</sup>C{<sup>1</sup>H}, <sup>31</sup>P{<sup>1</sup>H} spectra were recorded on a Varian Mercury 400 spectrometer (400.14, 100.63, and 161.98 MHz respectively). Chemical shifts were reported relative to tetramethylsilane for <sup>1</sup>H and <sup>13</sup>C{<sup>1</sup>H} as internal standard. <sup>31</sup>P chemical shifts were referenced to an external 85% H<sub>3</sub>PO<sub>4</sub> sample.

## SI. 2 Characterization of Palladium Complexes

**Figure 1.** <sup>1</sup>H NMR spectrum of complex [PdCl<sub>2</sub>(1)<sub>2</sub>] 1a (CD<sub>2</sub>Cl<sub>2</sub>, 298K)

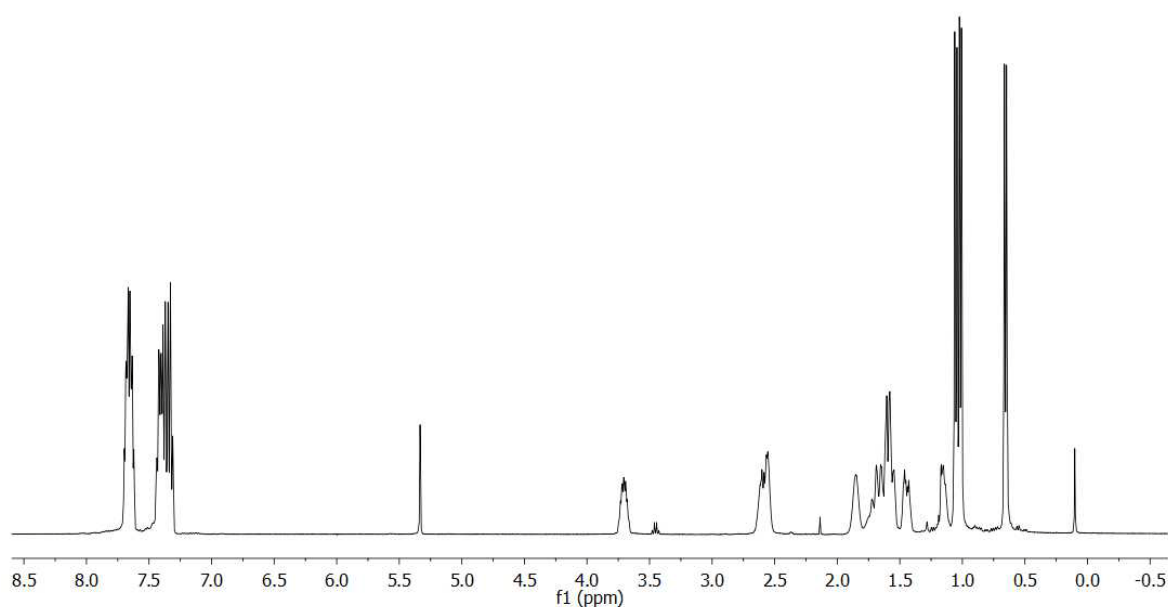

**Figure 2.** <sup>31</sup>P{<sup>1</sup>H} NMR spectrum of complex 1a (CD<sub>2</sub>Cl<sub>2</sub>, 298K)

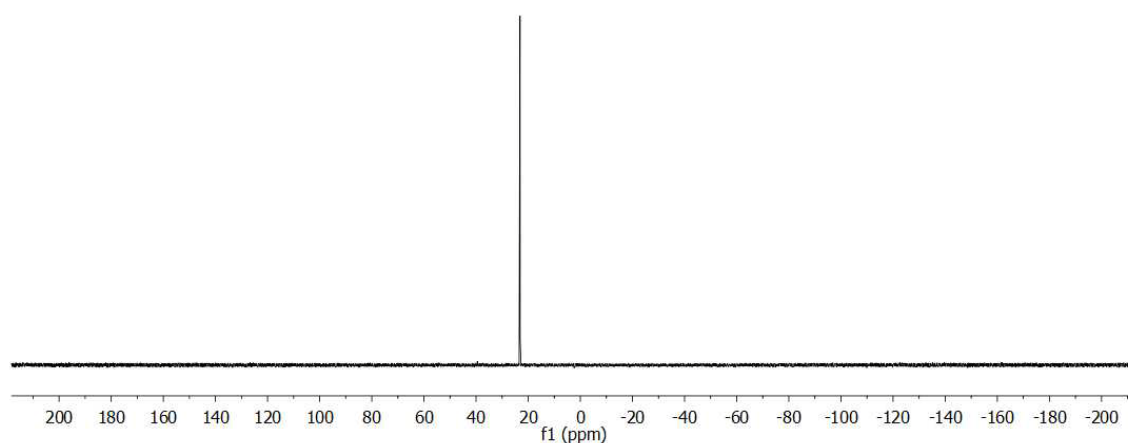

**Figure 3.**  $^1\text{H}$  NMR spectrum of  $[\text{PdCl}_2(\text{4})]$  **4a** ( $\text{CD}_2\text{Cl}_2$ , 298K)

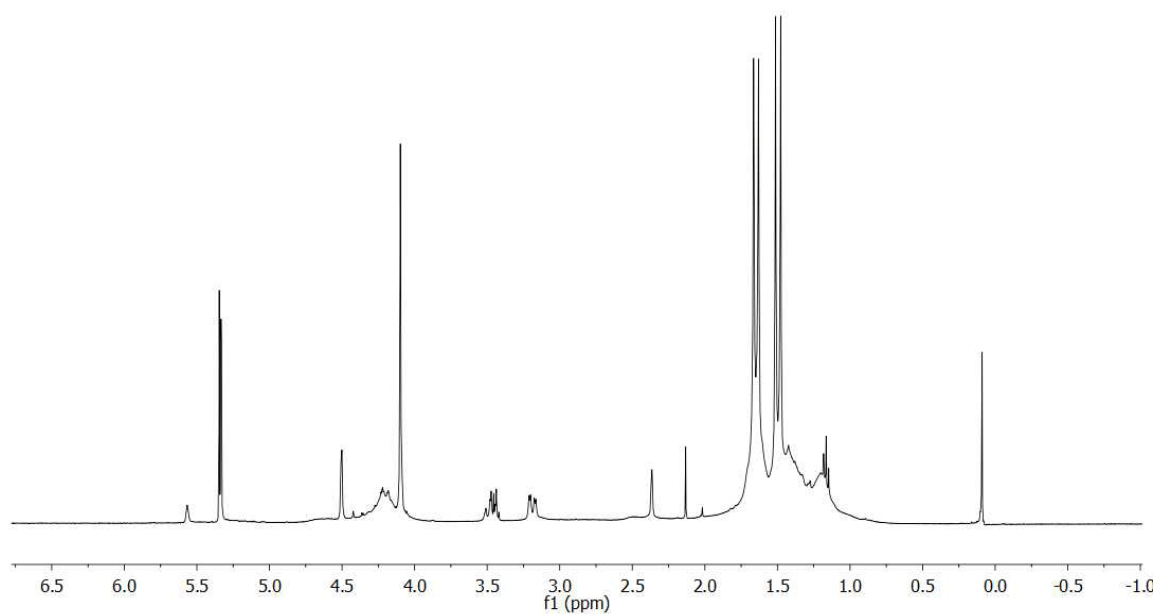

**Figure 4.**  $^{31}\text{P}\{^1\text{H}\}$  NMR spectrum of  $[\text{PdCl}_2(\text{4})]$  **4a** ( $\text{CD}_2\text{Cl}_2$ , 298K)

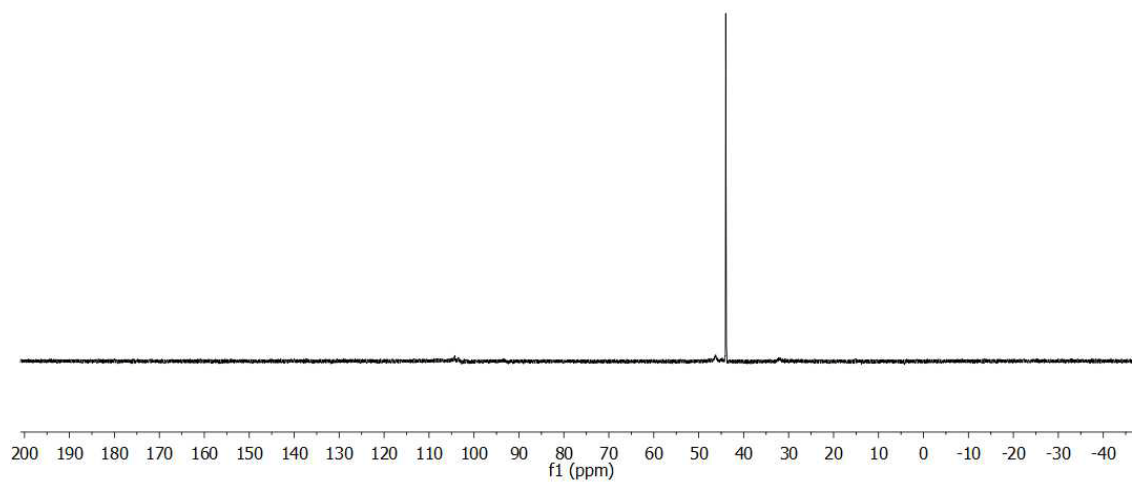

**Figure 5.**  $^1\text{H}$  NMR spectrum of  $4\text{-(H}^+)_2$  (THF- $d_8$ , 298K)

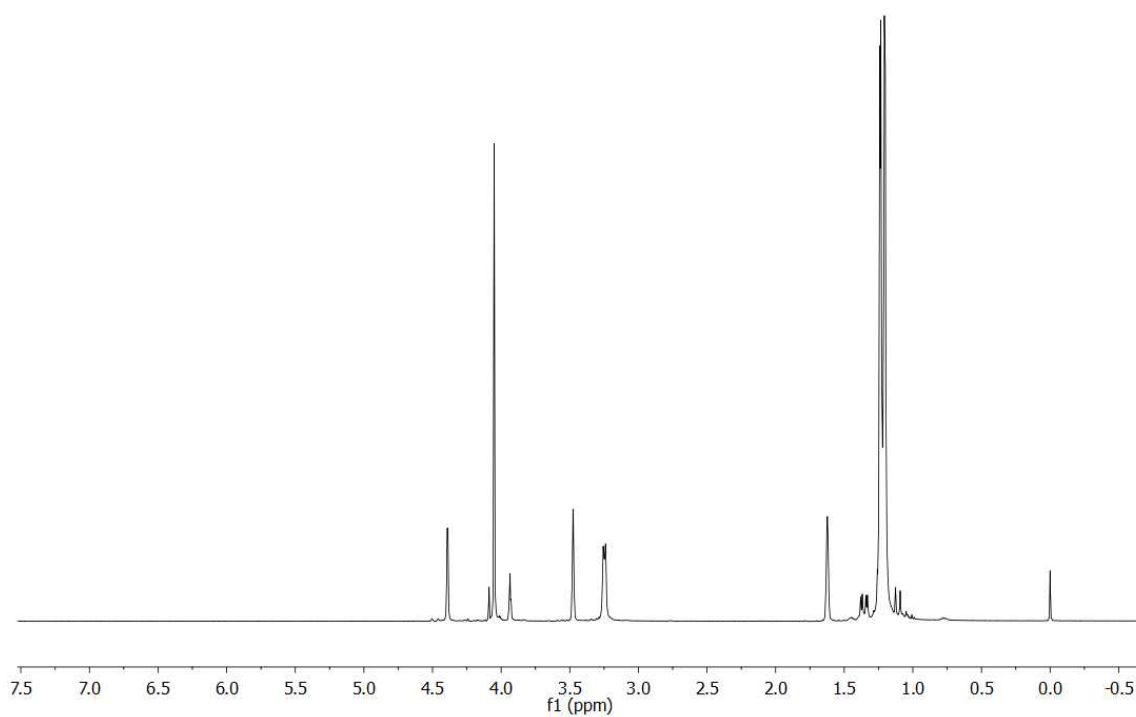

**Figure 6.**  $^{31}\text{P}\{^1\text{H}\}$  NMR spectrum of  $4\text{-(H}^+)_2$  (THF- $d_8$ , 298K)

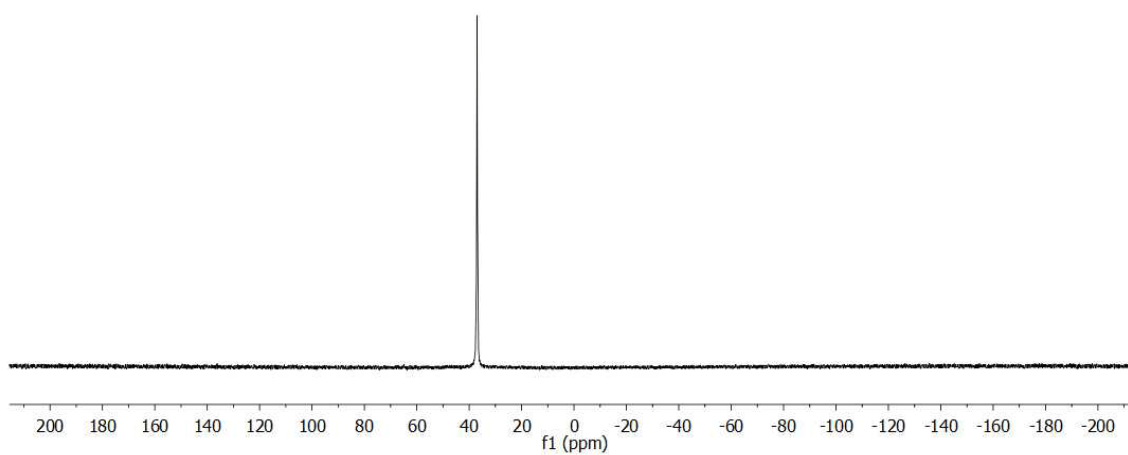

**Figure 7.**  $^1\text{H}$  NMR spectrum of  $[\text{PdBr}(7)]$  **7a** ( $\text{CD}_2\text{Cl}_2$  298K)

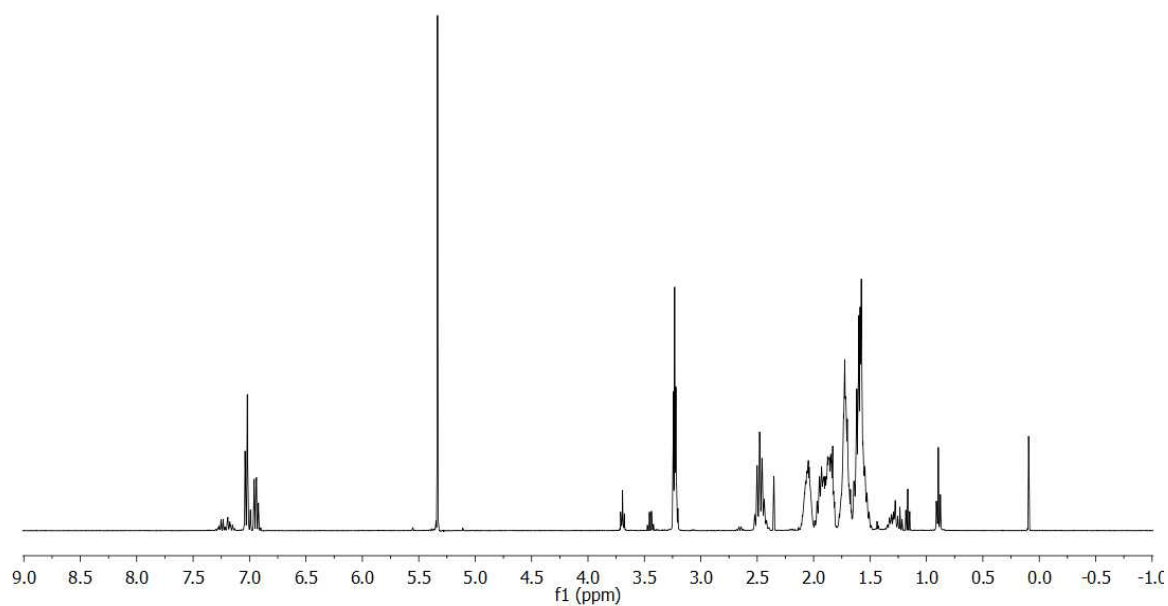

**Figure 8.**  $^{31}\text{P}\{^1\text{H}\}$  NMR spectrum of  $[\text{PdBr}(7)]$  **7a** ( $\text{CD}_2\text{Cl}_2$  298K)

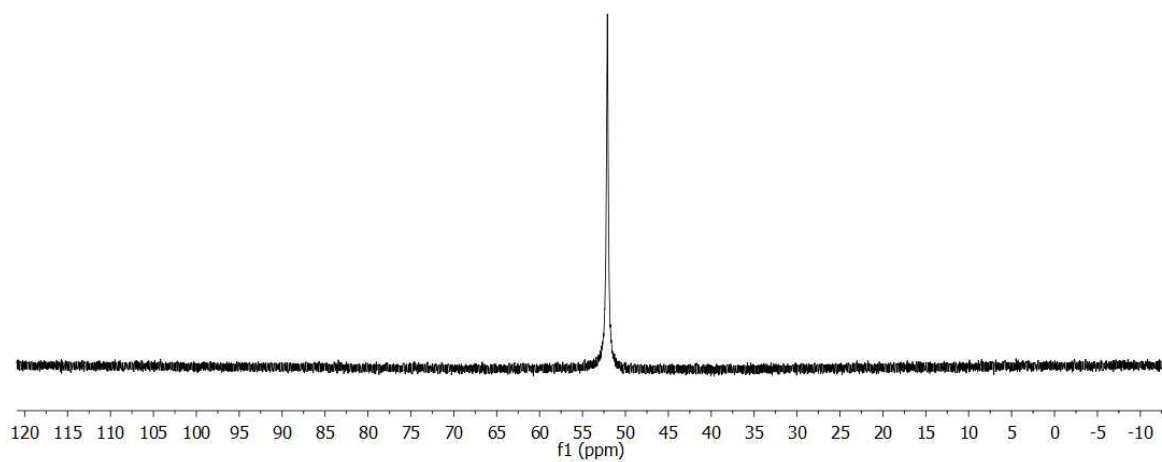

### SI. 3 X-ray data

Table 1. Crystal data for structures **4a** and **7a**

|                                                      | <b>4a</b>                                                                                            | <b>7a</b>                                           |
|------------------------------------------------------|------------------------------------------------------------------------------------------------------|-----------------------------------------------------|
| Empirical Formula                                    | C <sub>28</sub> H <sub>48</sub> Cl <sub>2</sub> FeP <sub>2</sub> Pd. C <sub>4</sub> H <sub>8</sub> O | C <sub>28</sub> H <sub>43</sub> BrP <sub>2</sub> Pd |
| M                                                    | 751.86                                                                                               | 627.87                                              |
| T/K                                                  |                                                                                                      | 293(2)                                              |
| $\lambda/\text{\AA}$                                 |                                                                                                      | 0.71073                                             |
| Crystal system                                       | Monoclinic                                                                                           | Orthorhombic                                        |
| Space group                                          | <i>P</i> 2 <sub>1</sub> /n                                                                           | <i>P</i> bca                                        |
| <i>a</i> / $\text{\AA}$                              | 11.558(3)                                                                                            | 15.151(3)                                           |
| <i>b</i> / $\text{\AA}$                              | 14.646(3)                                                                                            | 17.180(4)                                           |
| <i>c</i> / $\text{\AA}$                              | 20.721(4)                                                                                            | 21.361(4)                                           |
| $\beta/^\circ$                                       | 94.29(3)                                                                                             | 90.0                                                |
| Unit cell volume/ $\text{\AA}^3$                     | 3497.8(13)                                                                                           | 5560(2)                                             |
| D <sub>calcd</sub> /g cm <sup>-3</sup>               | 1.428                                                                                                | 1.500                                               |
| Z                                                    | 4                                                                                                    | 8                                                   |
| $\mu(\text{Mo K}\alpha)/\text{mm}^{-1}$              | 1.196                                                                                                | 2.234                                               |
| F(000)                                               | 1568                                                                                                 | 2576                                                |
| Theta range for data collection                      | 1.70 - 25.02                                                                                         | 2.62 - 27.10                                        |
| Absorption correction                                |                                                                                                      | refdelf                                             |
| Refinement method                                    |                                                                                                      | Full-matrix least squares on <i>F</i> <sup>2</sup>  |
| Data/parameter                                       | 6015/352                                                                                             | 5864/289                                            |
| Final R indices [ <i>I</i> >2 $\sigma$ ( <i>I</i> )] | R <sub>1</sub> =0.0510, wR <sub>2</sub> = 0.1159                                                     | R <sub>1</sub> =0.0395, wR <sub>2</sub> = 0.0959    |
| R indices (all data)                                 | R <sub>1</sub> = 0.1008, wR <sub>2</sub> = 0.1359                                                    | R <sub>1</sub> = 0.852, wR <sub>2</sub> = 0.1079    |
| Goodness-of-fit on <i>F</i> <sup>2</sup>             | 0.894                                                                                                | 0.860                                               |
| Largest diff peak and hole (e/ $\text{\AA}^3$ )      | 0.668, -0.406                                                                                        | 0.382, -0.697                                       |
